# Supplementary material
Source: PubMed Central journal article supplement (PMC4522162)
Supplement: NIHMS667818-supplement-01.pdf [file NIHMS667818-supplement-01.pdf]

**Supplementary Appendix 1.** International Classification of Disease, Ninth Revision, Clinical Modification (ICD-9-CM) diagnosis codes used to define medical diagnoses from billing claims data.

| <b>Diagnosis</b>                                  | <b>ICD-9-CM Diagnostic Codes</b>                                                                                                           |
|---------------------------------------------------|--------------------------------------------------------------------------------------------------------------------------------------------|
| Ventricular arrhythmias                           | 427.41, 427.42                                                                                                                             |
| Cardiac arrest                                    | 427.5, 997.1                                                                                                                               |
| Hypotension                                       | 458, 458.9                                                                                                                                 |
| Hypercapnia                                       | 276.4                                                                                                                                      |
| Aspiration pneumonia                              | 507.0, 507.1, 507.8, 997.32                                                                                                                |
| Mental status changes                             | 780.0, 780.01, 780.02, 780.03, 780.09, 800.x, 801.x, 803.x, 804.x, 850.x                                                                   |
| Accidents                                         | E806, E807, E826, E827, E829, E830, E831, E836, E838, E841, E842, E844, E845, E916, E918, E921, E928, E928.x, E929, E929.x, V714           |
| <b>Drug abuse / dependence</b>                    | <b>304.2, 304.0, 304.7, 304.3, 304.1, 304.4, 304.5, 304.6, 304.8, 304.9, 305.6, 305.5, 305.2, 305.3, 305.4, 305.7, 305.8, 305.9, 292.x</b> |
| <b>Alcohol abuse and associated complications</b> | <b>303.0, 303.9, 305.0, 291.x, 571.0, 571.2, 571.3, 535.3</b>                                                                              |
| Non-compliance                                    | V158.1                                                                                                                                     |

**Supplementary Appendix 2.** Adjusted associations of pre-transplant narcotic use with risks of the composite of any study complication over three years after kidney transplantation.

| Clinical factor                      | All Transplants   | LD Recipients     | DD Recipients     |
|--------------------------------------|-------------------|-------------------|-------------------|
|                                      | aHR (95% CI)      | aHR (95% CI)      | aHR (95% CI)      |
| <b>Pre-transplant narcotic use</b>   |                   |                   |                   |
| None                                 | Reference         | Reference         | Reference         |
| Level 1                              | 0.97 (0.81-1.15)  | 1.00(0.71-1.41)   | 0.96 (0.79-1.17)  |
| Level 2                              | 1.07 (0.91-1.26)  | 1.18 (0.87-1.60)  | 1.03 (0.85-1.25)  |
| Level 3                              | 1.26 (1.09-1.46)* | 1.25 (0.93-1.68)  | 1.26 (1.07-1.49)* |
| Level 4                              | 1.62 (1.42-1.85)‡ | 1.83 (1.40-2.38)‡ | 1.56 (1.33-1.82)‡ |
| <b>Recipient characteristics</b>     |                   |                   |                   |
| Age, years                           |                   |                   |                   |
| <18                                  | 0.84 (0.53-1.34)  | 0.59 (0.24-1.48)  | 0.97 (0.56-1.69)  |
| 18 to 30                             | Reference         | Reference         | Reference         |
| 31 to 45                             | 0.91 (0.75-1.11)  | 0.87 (0.64-1.19)  | 0.98 (0.76-1.26)  |
| 46 to 60                             | 1.05 (0.87-1.27)  | 0.94 (0.69-1.28)  | 1.14 (0.89-1.46)  |
| >60                                  | 1.03 (0.82-1.30)  | 0.91 (0.61-1.35)  | 1.12 (0.83-1.50)  |
| Male                                 | 1.00 (0.91-1.10)  | 0.95 (0.79-1.14)  | 1.03 (0.92-1.15)  |
| Race                                 |                   |                   |                   |
| White                                | Reference         | Reference         | Reference         |
| Black                                | 0.80 (0.71-0.91)‡ | 0.63 (0.35-1.12)  | 0.78 (0.68-0.90)‡ |
| Other race                           | 0.68 (0.57-0.79)‡ | 0.92 (0.59-1.42)  | 0.66 (0.55-0.79)‡ |
| Body mass index, kg/m <sup>2</sup>   |                   |                   |                   |
| <18.5                                | 1.16 (0.92-1.47)  | 1.18 (0.75-1.84)  | 1.16 (0.88-1.53)  |
| 18.5 to 25                           | Reference         | Reference         | Reference         |
| 25 to 30                             | 0.99 (0.89-1.10)  | 1.00 (0.81-1.25)  | 0.99 (0.88-1.12)  |
| >30                                  | 0.97 (0.86-1.09)  | 1.08 (0.86-1.36)  | 0.94 (0.82-1.08)  |
| Highest level of education           |                   |                   |                   |
| Grade school                         | Reference         | Reference         | Reference         |
| High school                          | 1.14 (0.93-1.39)  | 0.98 (0.60-1.58)  | 1.19 (0.96-1.48)  |
| Some college or higher               | 1.00 (0.82-1.22)  | 1.06 (0.65-1.72)  | 0.97 (0.78-1.22)  |
| Unknown                              | 1.01 (0.81-1.24)  | 1.00 (0.60-1.66)  | 0.99 (0.79-1.26)  |
| Employment status                    |                   |                   |                   |
| Working                              | 0.71 (0.60-0.84)‡ | 0.79 (0.58-1.07)  | 0.68 (0.56-0.84)‡ |
| Not working                          | Reference         | Reference         | Reference         |
| Unknown                              | 0.86 (0.75-0.98)* | 0.91 (0.69-1.21)  | 0.84 (0.72-0.98)* |
| Insurance type                       |                   |                   |                   |
| Public                               | Reference         | Reference         | Reference         |
| Private                              | 0.51 (0.43-0.59)‡ | 0.47 (0.35-0.62)‡ | 0.54 (0.45-0.66)‡ |
| Other/unknown                        | 0.91 (0.33-2.52)  | NA                | 1.13 (0.40-3.19)  |
| Pre-transplant ESRD duration, months |                   |                   |                   |
| None (pre-emptive)                   | 0.76 (0.61-0.95)* | 0.82 (0.57-1.20)  | 0.79 (0.59-1.06)  |
| >0 to 24                             | Reference         | Reference         | Reference         |
| 25 to 60                             | 0.98 (0.85-1.14)  | 1.07 (0.82-1.41)  | 0.96 (0.81-1.14)  |
| >60                                  | 1.4 (1.23-1.59)   | 1.61 (1.19-2.18)‡ | 1.39 (1.20-1.61)‡ |

**Supplementary Appendix 2, continued.** Adjusted associations of pre-transplant narcotic use with risks of the composite of any study complication over three years after kidney transplantation.

|                                   |                   |                   |                   |
|-----------------------------------|-------------------|-------------------|-------------------|
| Cause of ESRD                     |                   |                   |                   |
| Diabetes                          | 1.16 (0.97-1.38)  | 1.11 (0.78-1.59)  | 1.17 (0.95-1.44)  |
| Glomerulonephritis                | 0.89 (0.77-1.03)  | 0.75 (0.57-0.99)* | 0.94 (0.79-1.12)  |
| Hypertension                      | 1.02 (0.89-1.17)  | 0.98 (0.75-1.28)  | 1.05 (0.90-1.22)  |
| Polycystic kidney disease         | 0.91 (0.75-1.11)  | 0.88 (0.59-1.30)  | 0.93 (0.74-1.16)  |
| Other                             | Reference         | Reference         | Reference         |
| Recipient co-morbidities          |                   |                   |                   |
| Diabetes                          | 1.21 (1.05-1.39)* | 1.06 (0.79-1.42)  | 1.26 (1.08-1.48)* |
| Coronary disease/angina           | 1.07 (0.89-1.29)  | 0.96 (0.63-1.46)  | 1.11 (0.91-1.37)  |
| COPD                              | 1.32 (0.96-1.82)  | 1.35 (0.72-2.52)  | 1.32 (0.91-1.93)  |
| Hypertension                      | 0.88 (0.80-0.96)* | 0.88 (0.73-1.05)  | 0.88 (0.79-0.97)* |
| Cerebral vascular disease         | 1.26 (1.01-1.58)* | 1.17 (0.70-1.97)  | 1.26 (0.98-1.62)  |
| Peripheral vascular disease       | 1.08 (0.90-1.29)  | 1.06 (0.73-1.53)  | 1.08 (0.88-1.33)  |
| Previous transplant               | 1.1 (0.95-1.26)   | 1.03 (0.78-1.36)  | 1.12 (0.95-1.32)  |
| Peak PRA level                    |                   |                   |                   |
| < 10                              | Reference         | Reference         | Reference         |
| 10 to 79                          | 1.00 (0.89-1.13)  | 0.94 (0.74-1.20)  | 1.02 (0.89-1.17)  |
| ≥80                               | 1.26 (1.08-1.46)* | 1.24 (0.87-1.77)  | 1.28 (1.08-1.51)* |
| Missing                           | 1.27 (1.04-1.56)* | 1.08 (0.74-1.57)  | 1.38 (1.09-1.75)* |
| <b>Transplant Characteristics</b> |                   |                   |                   |
| HLA mismatches                    |                   |                   |                   |
| Zero A, B, and DR                 | 0.93 (0.80-1.07)  | 1.08 (0.78-1.49)  | 0.88 (0.75-1.04)  |
| Zero DR                           | 0.95 (0.87-1.04)  | 1.07 (0.90-1.28)  | 0.92 (0.83-1.02)  |
| Other                             | Reference         | Reference         | Reference         |
| Donor age, per year               | 1.00 (1.00-1.01)* | 1.00 (1.00-1.01)  | 1.00 (1.00-1.01)* |
| Donor race                        |                   |                   |                   |
| White                             | Reference         | Reference         | Reference         |
| Black                             | 1.07 (0.94-1.23)  | 1.53 (0.85-2.75)  | 1.02 (0.88-1.18)  |
| Other race                        | 1.01 (0.89-1.14)  | 0.69 (0.45-1.05)  | 1.04 (0.91-1.19)  |
| Female donor                      | 1.05 (0.96-1.14)  | 1.03 (0.87-1.23)  | 1.06 (0.95-1.17)  |
| CMV sero-pairing                  |                   |                   |                   |
| Recipient -, Donor -              | Reference         | Reference         | Reference         |
| Recipient +, Donor -              | 1.03 (0.89-1.20)  | 0.99 (0.76-1.29)  | 1.06 (0.88-1.28)  |
| Recipient -, Donor +              | 1.18 (1.01-1.37)* | 1.11 (0.83-1.47)  | 1.22 (1.02-1.47)* |
| Recipient +, Donor+               | 1.15 (1.00-1.33)* | 1.07 (0.83-1.38)  | 1.20 (1.01-1.43)* |
| Donor Type                        |                   |                   |                   |
| Living                            | 0.87 (0.78-0.98)* | NA                | NA                |
| Standard criteria deceased        | Reference         | Reference         | Reference         |
| Expanded criteria deceased        | 0.95 (0.82-1.10)  | NA                | NA                |

Abbreviations: aHR, adjusted hazard ratio; CMV, cytomegalovirus; COPD, chronic obstructive pulmonary disease; DD, deceased donor; ESRD, end-stage renal disease; HLA, human leukocyte antigen; LD, living donor; NA, not available due to lack of events in a given stratum; PRA, panel reactive antibody

P-values: \* p<0.05–0.002; † p=0.001–0.0002; ‡ p<0.0001
